# Supplementary material for: Toward an Early Diagnosis for Alzheimer’s Disease Based on the Perinuclear Localization of the ATM Protein
Source: MDPI journal article supplement (doi:10.3390/cells12131747), 2023-06-29
Supplement: s1 [file s1]

## Supplementary Data

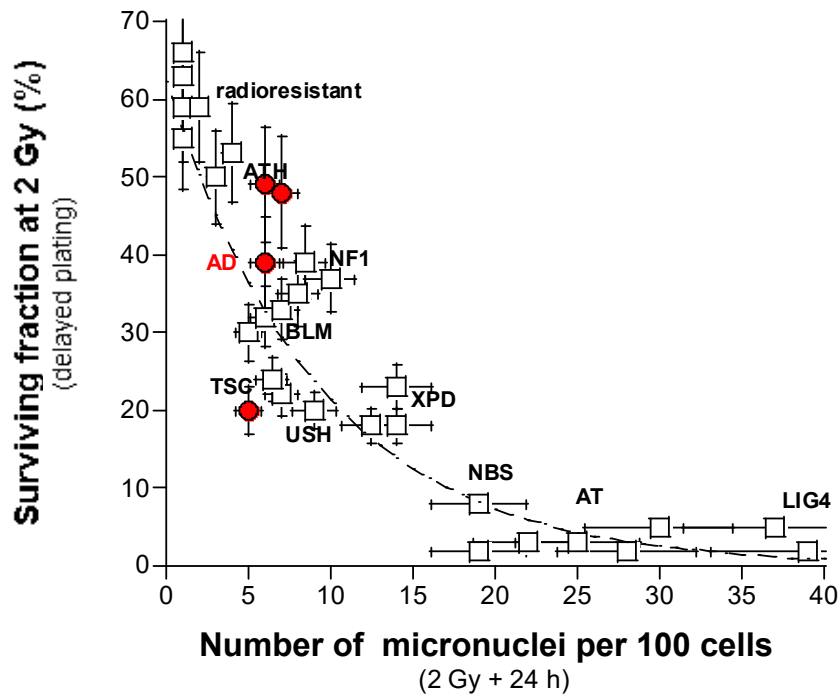

**Figure S1: Correlation between SF2 and residual micronuclei data.** Our data from AD cells were added to the figure 3B shown in [14]. The SF2 values ( $\pm$  SEM) and the corresponding numbers of micronuclei per 100 cells assessed 24 h post-irradiation ( $\pm$  SEM) from fibroblasts deriving from patients suffering from the indicated syndromes (open squares) (AT:ataxia telangiectasia, homozygous mutations of *ATM*; LIG4 : homozygous mutations of *LIG4*; NBS: Nijmegen's syndrome, homozygous mutations of *NBS1*; XPD, xeroderma pigmentosum D, homozygous mutations of *XPD*; USH, Usher's syndrome, homozygous mutations of *USH*; TSC, tuberous sclerosis , heterozygous mutation of *TSC*; Bloom's syndrome, homozygous mutations of *BLM*; NF1, neurofibromatosis type 1, heterozygous mutations of neurofibromin; ATH, heterozygous mutations of *ATM*). The red circles are the data obtained from the AD cell lines. The best data fit was obtained with the following law:  $y = 62.2 \exp(-0.107 x)$ ;  $r^2=0.939$  (dotted line) in quantitative agreement with [14].

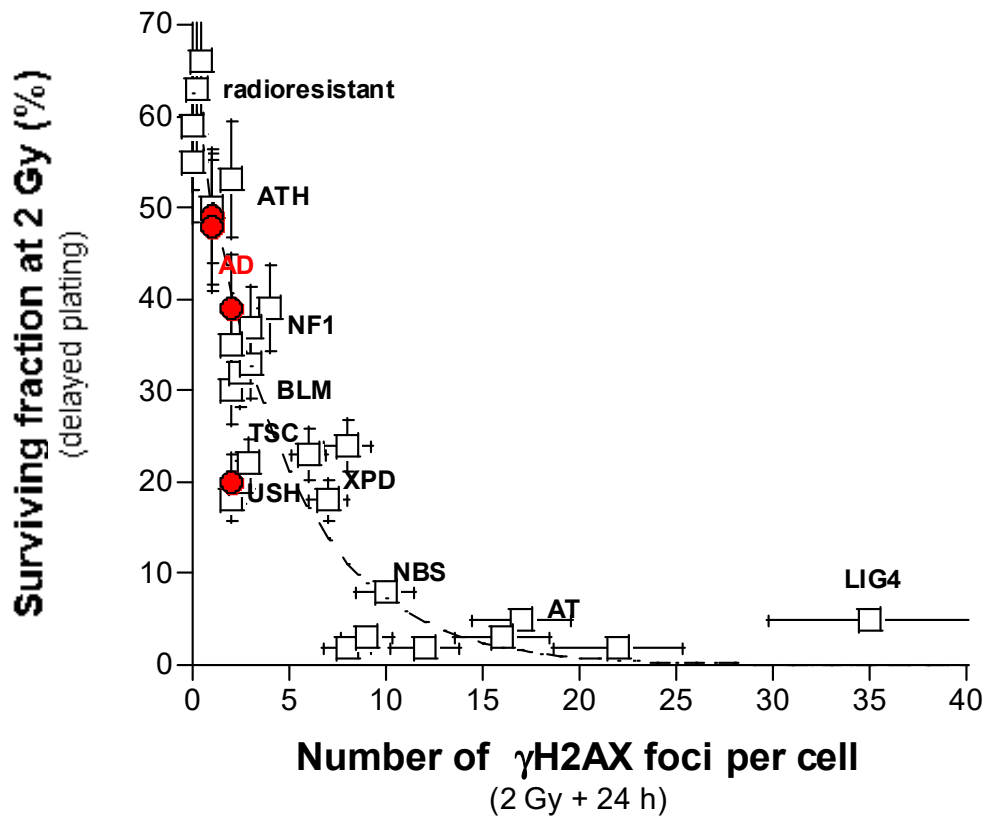

**Figure S2: Correlation between SF2 and residual  $\gamma$ H2AX foci data.** Our data from AD cells were added to the figure 5B shown in [38]. The SF2 values ( $\pm$  SEM) and the corresponding numbers of  $\gamma$ H2AX foci assessed 24 h post-irradiation ( $\pm$  SEM) from fibroblasts deriving from patients suffering from the indicated syndromes (open squares) (AT:ataxia telangiectasia, homozygous mutations of *ATM*; LIG4 : homozygous mutations of *LIG4*; NBS: Nijmegen's syndrome, homozygous mutations of *NBS1*; XPD, xeroderma pigmentosum D, homozygous mutations of *XPD*; USH, Usher's syndrome, homozygous mutations of *USH*; TSC, tuberous sclerosis , heterozygous mutation of *TSC*; Bloom's syndrome, homozygous mutations of *BLM*; NF1, neurofibromatosis type 1, heterozygous mutations of neurofibromin; ATH, heterozygous mutations of *ATM*. The red circles are the data obtained from the AD cell lines. The best data fit was obtained with the law:  $y = 62.56 \exp(-0.216 x)$ ;  $r^2 = 0.87$  (dotted line). in quantitative agreement with [14].

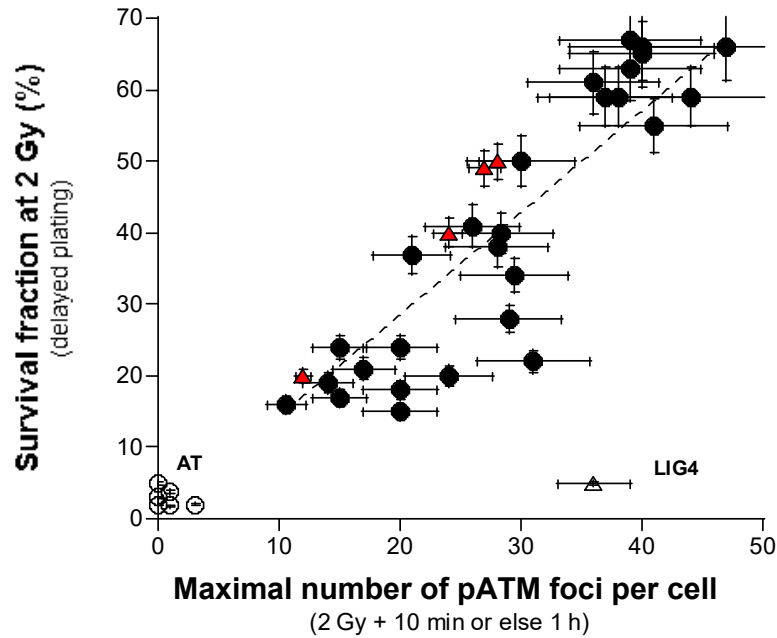

**Figure S3. Correlation between SF2 and pATMmax data.** Our data from AD cells were added to the figure 7A shown in [14]. The SF2 data from 36 COPERNIC cell lines were plotted against the corresponding maximal number of pATM foci per cell assessed either at 10 min or at 1h post-irradiation (closed circles). Each point corresponds to the mean  $\pm$  standard error of the mean (SEM) of 3 independent triplicates, at least. The red triangles are the data obtained from the AD cell lines. The best data fit was obtained with the linear law:  $y=1.422x$ ;  $r^2=0.87$  (dotted line).

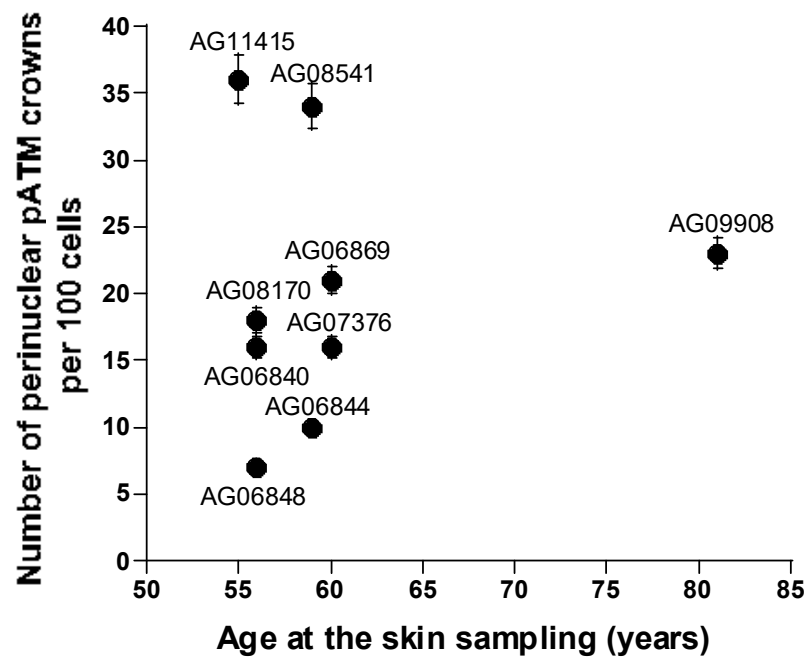

**Figure S4. The number of perinuclear pATM crowns per 100 cells vs. the age at the skin sampling.** The number of perinuclear pATM crowns per 100 cells shown in Fig. 3B ( $\pm$  SEM) were plotted against the correspondent age at the skin sampling of the donor.
